# Supplementary material
Source: HighWire-hosted journal article supplement (https://injuryprevention.bmj.com/content/30/1/20)
Supplement: inline-supplementary-material-1 [file inline-supplementary-material-1.pdf]

**Supplementary table 1.** Comparisons between coaches of different sex and coaches for male versus female teams.

| <b>Health Action Process Approach construct in bold. The respective questions are presented in italics.</b> | Male coaches<br>(n =379) | Female<br>coaches<br>(n =61) | Comparison male vs<br>female coaches (p-<br>value; Cohen's <i>d</i> ) | Male team<br>(n =262) | Female<br>team<br>(n =163) | Comparison<br>coaches for male<br>vs female teams<br>(p-value; Cohen's<br><i>d</i> ) |
|-------------------------------------------------------------------------------------------------------------|--------------------------|------------------------------|-----------------------------------------------------------------------|-----------------------|----------------------------|--------------------------------------------------------------------------------------|
| <b>Injury risk perceptions</b>                                                                              |                          |                              |                                                                       |                       |                            |                                                                                      |
| <i>What do you think about the overall injury risk in football? (low–high)</i>                              | 5.0 (1.0)                | 5.0 (1.5)                    | p=0.337; <i>d</i> =0.092                                              | 5.0 (1.0)             | 5.0 (1.0)                  | p=0.359; <i>d</i> =0.089                                                             |
| <i>What do you think about the injury risk in the team that you coach? (low–high)</i>                       | 4.0 (2.0)*               | 4.0 (2.0)                    | p=0.475; <i>d</i> =0.068                                              | 4.0 (2.0)             | 4.0 (2.0)*                 | p=0.786; <i>d</i> =0.026                                                             |
| <b>Outcome expectancies</b>                                                                                 |                          |                              |                                                                       |                       |                            |                                                                                      |
| <i>I believe many injuries can be prevented in football (do not agree–agree)</i>                            | 6.0 (2.0)*               | 6.0 (1.0)                    | p=0.816; <i>d</i> =0.022                                              | 6.0 (1.0)             | 6.0 (1.0)*                 | p=0.325; <i>d</i> =0.095                                                             |
| <i>I believe specific training can prevent injuries in football (do not agree–agree)</i>                    | 6.0 (1.3)*               | 6.0 (2.0)                    | p=0.377; <i>d</i> =0.084                                              | 6.0 (2.0)             | 6.0 (1.3)*                 | p=0.624; <i>d</i> =0.048                                                             |
| <b>Action self-efficacy</b>                                                                                 |                          |                              |                                                                       |                       |                            |                                                                                      |
| <i>My knowledge about preventing injuries in football is... (inadequate–adequate)</i>                       | 5.0 (1.0)                | 5.0 (1.0)                    | p=0.329; <i>d</i> =0.093                                              | 5.0 (1.0)             | 5.0 (1.0)                  | p=0.054; <i>d</i> =0.188                                                             |

Values are median (IQR), p-values and effect sizes, Cohen's *d*. All questions are rated on a 1–7 Likert scale from 1 = low/do not agree/inadequate to 7=high/agree/adequate. Responses from the 15 coaches who responded that they coached both male and female teams are not presented in the table or comparisons. All comparisons were made with Mann Whitney U-test and effect sizes eta squared were transformed to Cohen's *d*.

\* 1 missing answer.
